# Supplementary material for: Efficient conversion of cotton stalks over a Fe modified HZSM-5 catalyst under microwave irradiation
Source: Royal Society of Chemistry journal article supplement (doi:10.1039/c5ra26918k), 2016-01-01
Supplement: c5ra26918k1.pdf [file c5ra26918k1.pdf]

## Efficient conversion of cotton stalk over Fe modified HZSM-5 catalyst under microwave irradiation

Xiangjin Kong\*, Xiaole Li, Shuxiang Wu, Xin Zhang, Junhai Liu\*

Shandong Provincial Key Laboratory of Chemical Energy Storage and Novel Cell Technology, School of Chemistry and Chemical Engineering, Liaocheng University, Liaocheng 252059, China.

Corresponding author's E-mail: kongxjin@163.com.

**Table S1** Components of the sample over HZSM-5 by conventional reaction

| Compound                               | Formula                                         | Area (%) |
|----------------------------------------|-------------------------------------------------|----------|
| Benzonitrile                           | C <sub>7</sub> H <sub>5</sub> N                 | 2.30     |
| 1-paopanone                            | C <sub>9</sub> H <sub>10</sub> O                | 5.86     |
| Thiomorpholine                         | C <sub>4</sub> H <sub>9</sub> NS                | 1.89     |
| Cyclohexaneethanol                     | C <sub>8</sub> H <sub>16</sub> O                | 1.01     |
| 8-Heptadecene                          | C <sub>17</sub> H <sub>34</sub>                 | 2.10     |
| Hexadecanoic acid, methyl ester        | C <sub>17</sub> H <sub>34</sub> O <sub>2</sub>  | 1.82     |
| 2-(Pro-2-enoyloxy) tridecane           | C <sub>16</sub> H <sub>30</sub> O <sub>2</sub>  | 2.93     |
| 9,12-Octadecadienoic acid, methyl      | C <sub>19</sub> H <sub>34</sub> O <sub>2</sub>  | 3.37     |
| Oleic Acid                             | C <sub>18</sub> H <sub>34</sub> O <sub>2</sub>  | 33.07    |
| 1-Hexyl-1-nitrocyclohexane             | C <sub>12</sub> H <sub>23</sub> NO <sub>2</sub> | 6.13     |
| 9-Octadecenoic acid (Z)-, methyl ester | C <sub>19</sub> H <sub>36</sub> O <sub>2</sub>  | 14.05    |
| 1-Cyano-4-(5-hexenyl)benzene           | C <sub>13</sub> H <sub>15</sub> N               | 6.14     |
| E-2-Octadecadecen-1-ol                 | C <sub>18</sub> H <sub>36</sub> O               | 3.33     |
| Pentadec-7-ene, 7-bromomethyl-         | C <sub>16</sub> H <sub>31</sub> Br              | 3.22     |
| 2-(3-Hydroxybutyl)cyclooctanone        | C <sub>12</sub> H <sub>22</sub> O <sub>2</sub>  | 1.65     |

**Table S2** Components of the sample over HZSM-5 by microwave irradiation

| Compound                                                                               | Formula                                        | Area (%) |
|----------------------------------------------------------------------------------------|------------------------------------------------|----------|
| Ethane                                                                                 | C <sub>2</sub> H <sub>6</sub>                  | 1.31     |
| Ketene                                                                                 | C <sub>2</sub> H <sub>2</sub> O                | 2.08     |
| Benzonitrile                                                                           | C <sub>7</sub> H <sub>5</sub> N                | 5.62     |
| 1,3-Benzodioxole, 5-(2-nitro-1-pro penyl)-                                             | C <sub>10</sub> H <sub>9</sub> NO <sub>4</sub> | 2.91     |
| Propanoic acid                                                                         | C <sub>3</sub> H <sub>6</sub> O <sub>2</sub>   | 10.06    |
| o-Xylene                                                                               | C <sub>8</sub> H <sub>10</sub>                 | 13.01    |
| Ethanamine, N-ethyl-                                                                   | C <sub>4</sub> H <sub>11</sub> N               | 1.48     |
| m-Methoxybenzonitrile                                                                  | C <sub>8</sub> H <sub>7</sub> NO               | 1.37     |
| 2-Pentynal semicarbazone                                                               | C <sub>6</sub> H <sub>9</sub> N <sub>3</sub> O | 1.06     |
| Benzoic acid, ethyl ester                                                              | C <sub>9</sub> H <sub>10</sub> O <sub>2</sub>  | 8.17     |
| Homopierazine                                                                          | C <sub>5</sub> H <sub>12</sub> N <sub>2</sub>  | 1.39     |
| 1-Hexene                                                                               | C <sub>6</sub> H <sub>12</sub>                 | 2.11     |
| 1,3-Dioxolane-2-propanoic acid, 2-                                                     | C <sub>9</sub> H <sub>16</sub> O               | 1.83     |
| 4-Ethoxybenzal doxime                                                                  | C <sub>9</sub> H <sub>11</sub> NO <sub>2</sub> | 1.26     |
| Benzene,(1-methyldodecyl)- (1-methyldodecyl)-<br>(1-methyldodecyl)- (1-methyldodecyl)- | C <sub>19</sub> H <sub>32</sub>                | 1.70     |
| Hexadecanoic acid, methyl eester                                                       |                                                | 1.06     |
| Pentadecanal-                                                                          | C <sub>17</sub> H <sub>34</sub> O <sub>2</sub> | 1.76     |
| 7-Octadecenoic acid, methyl ester                                                      |                                                | 6.30     |
| 9,12-Octadecadienoic acid, methyl ester                                                | C <sub>19</sub> H <sub>34</sub> O <sub>2</sub> | 3.31     |
| 11-Octadecenoic acid, methyl ester                                                     | C <sub>19</sub> H <sub>36</sub> O <sub>2</sub> | 4.64     |
| Bis(2-ethylhexyl) phthalate                                                            | C <sub>24</sub> H <sub>38</sub> O <sub>4</sub> | 8.29     |

**Table S3** Components of the sample over 0.02-Fe-HZSM-5 by microwave irradiation

| Compound                                      | Formula                                        | Area (%) |
|-----------------------------------------------|------------------------------------------------|----------|
| Ketene                                        | C <sub>2</sub> H <sub>2</sub> O                | 4.92     |
| Ethane                                        | C <sub>2</sub> H <sub>6</sub>                  | 2.50     |
| Mthy 3-hydroxytetradecanote                   | C <sub>15</sub> H <sub>30</sub> O <sub>3</sub> | 3.94     |
| Propanoic acid                                | C <sub>3</sub> H <sub>6</sub> O <sub>2</sub>   | 2.04     |
| Ethanamine, 2-propoxy-                        | C <sub>5</sub> H <sub>13</sub> NO              | 1.85     |
| Benzene, (2-isothiocyanatoethyl)-             | C <sub>9</sub> H <sub>9</sub> NS               | 1.76     |
| Benzene, (1-methyldodecyl)-                   | C <sub>19</sub> H <sub>32</sub>                | 2.61     |
| Hexadecanoic acid, methyl ester               | C <sub>17</sub> H <sub>34</sub> O <sub>2</sub> | 3.17     |
| 7-Octadecenoic acid, methyl ester             | C <sub>19</sub> H <sub>36</sub> O <sub>2</sub> | 20.43    |
| 9,17-Octadecadienal, (Z)-                     | C <sub>18</sub> H <sub>32</sub> O              | 4.52     |
| Octadecanoic acid, methyl ester               | C <sub>19</sub> H <sub>38</sub> O <sub>2</sub> | 1.43     |
| 9,12-Octadecadienoic acid (Z,Z)-,methyl ester | C <sub>19</sub> H <sub>34</sub> O <sub>2</sub> | 4.53     |
| 2-Ethylacridine                               | C <sub>15</sub> H <sub>13</sub> N              | 4.03     |
| Bis (2-ethylhexyl) phthalate                  | C <sub>24</sub> H <sub>38</sub> O <sub>4</sub> | 25.74    |

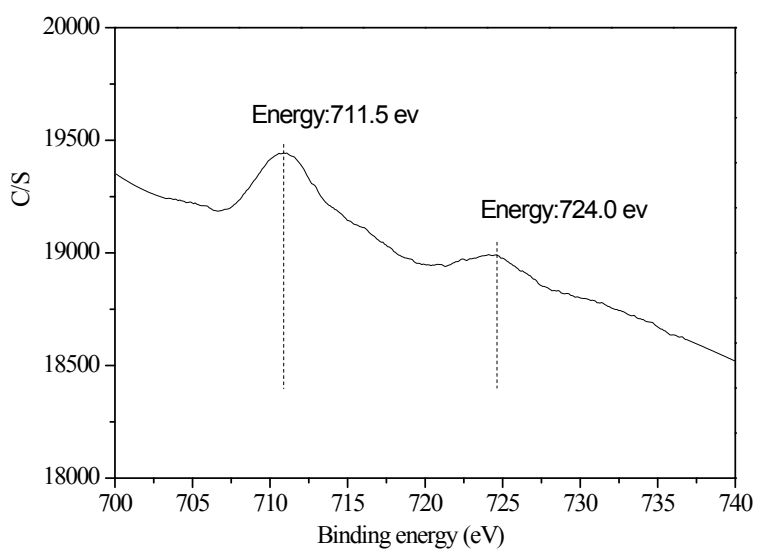**Fig. S1** XPS spectra of Fe 2p on 0.02-Fe-HZSM-5

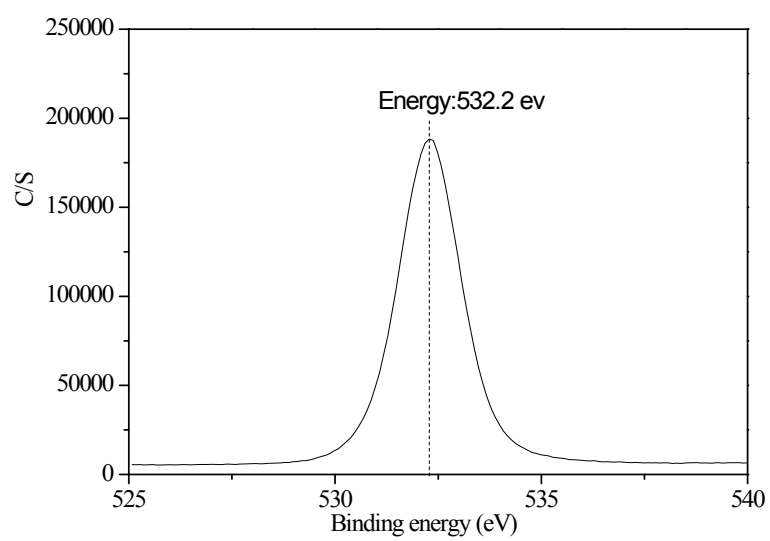

Fig. S2 XPS spectra of O 1s on 0.02-Fe-HZSM-5

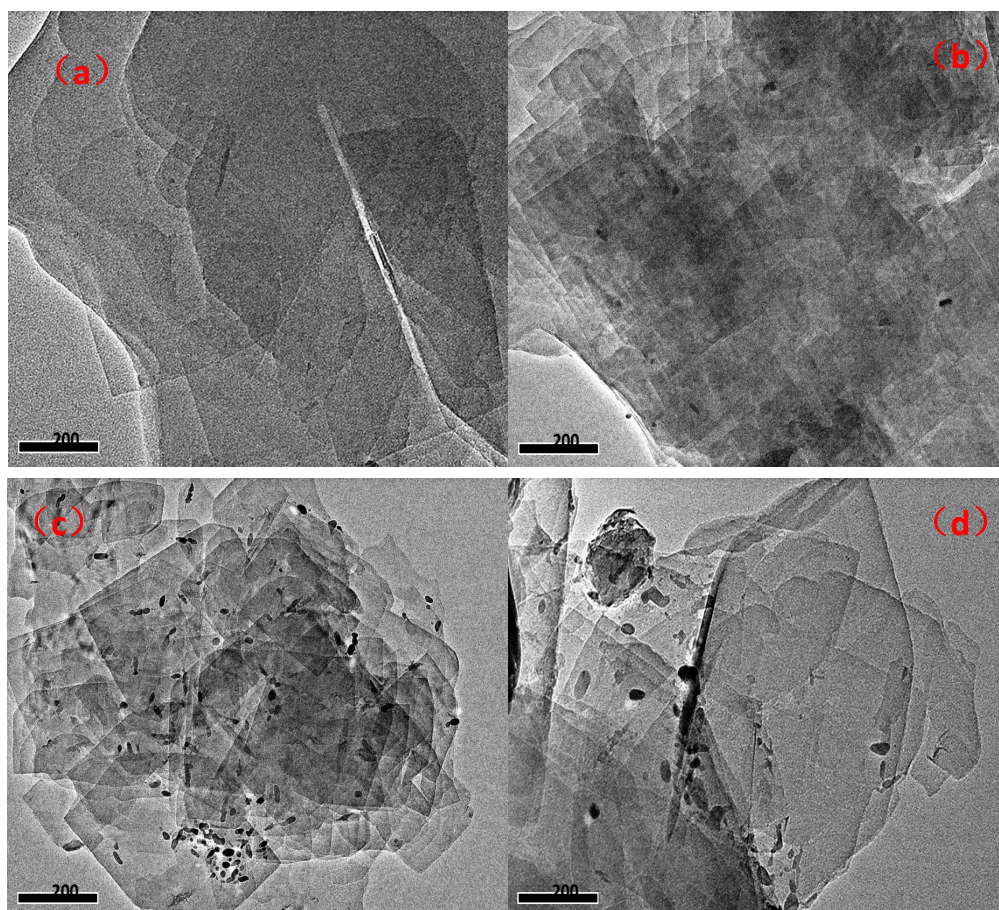

Fig. S3 (a) HZSM-5, (b) 0.01-Fe-HZSM-5, (c) 0.02-Fe-HZSM-5, (d) 0.04-Fe-HZSM-5
